# Supplementary material
Source: PubMed Central journal article supplement (PMC4033667)
Supplement: NIHMS561041-supplement-supplement_1.pdf [file NIHMS561041-supplement-supplement_1.pdf]

# The Yield of Downstream Tests after Exercise Treadmill Testing: A Prospective Cohort Study Online Appendix

---

Mitalee P. Christman<sup>\*</sup>, Marcio Sommer Bittencourt MD<sup>†</sup>, Edward Hulten MD MPH<sup>†</sup>,  
Ekta Saksena<sup>‡</sup>, Jon Hainer BSc<sup>†</sup>, Hicham Skali MD<sup>†</sup>, Raymond Y. Kwong MD<sup>†</sup>,  
Daniel E. Forman MD<sup>†</sup>, Sharmila Dorbala MD<sup>†</sup>, Patrick T. O’Gara MD<sup>†</sup>,  
Marcelo F. Di Carli MD<sup>†</sup>, Ron Blankstein MD<sup>†</sup>

## **Table of Contents:**

- 1A) Sensitivity analysis excluding patients with incomplete follow-up (page 2)**
  
- 1B) Subgroup analysis of yield of nuclear stress testing after ETT (page 5)**
  
- 1C) Characteristics of patients with positive versus negative downstream tests after positive ETT (page 7)**

**Appendix 1A**

We conducted a sensitivity analysis on the frequency and results of downstream testing excluding patients lost to follow-up for cardiovascular events. All results were unchanged.

**Figure 1: Frequency of Inconclusive ETT (n=971)**

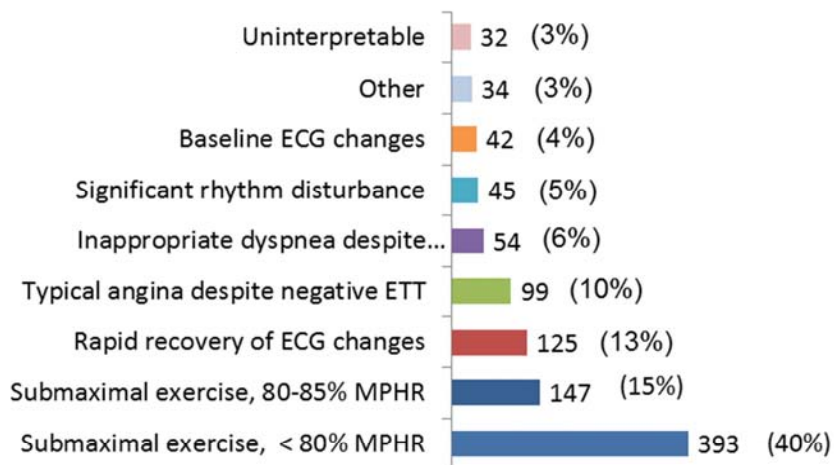

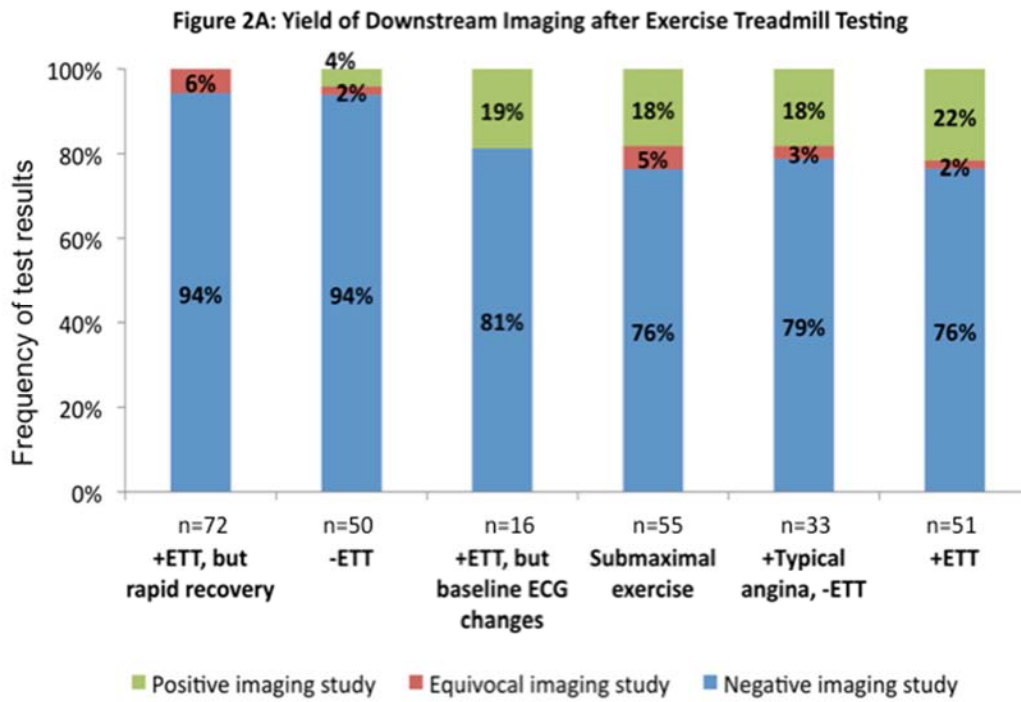

2

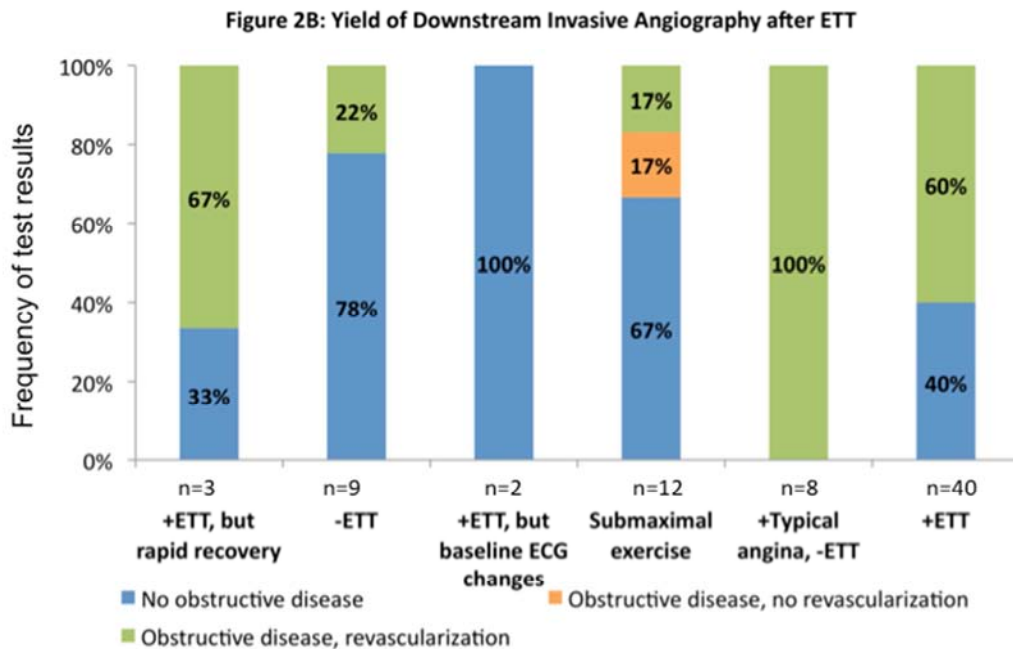

3

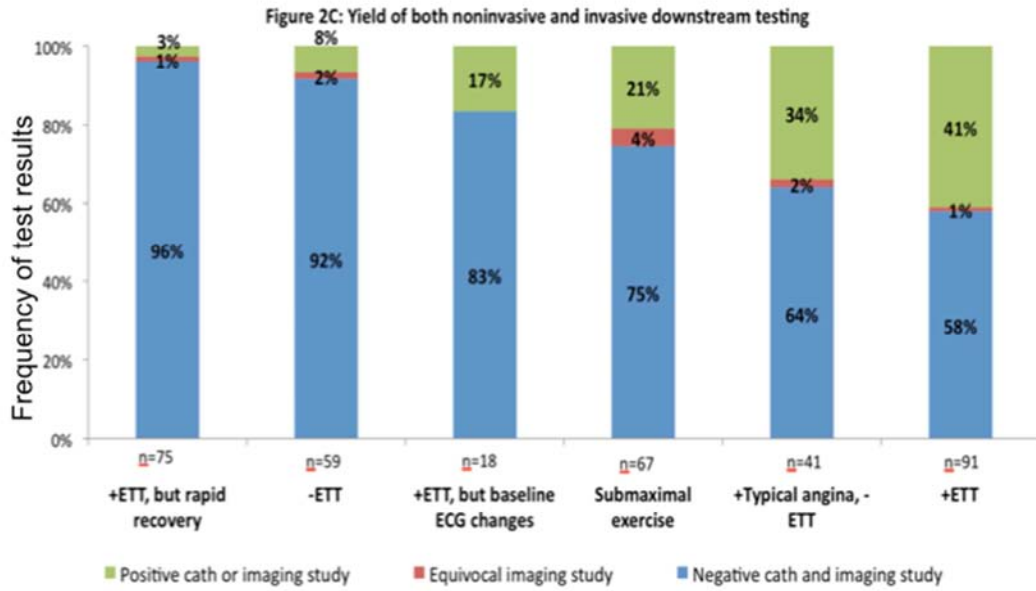

4

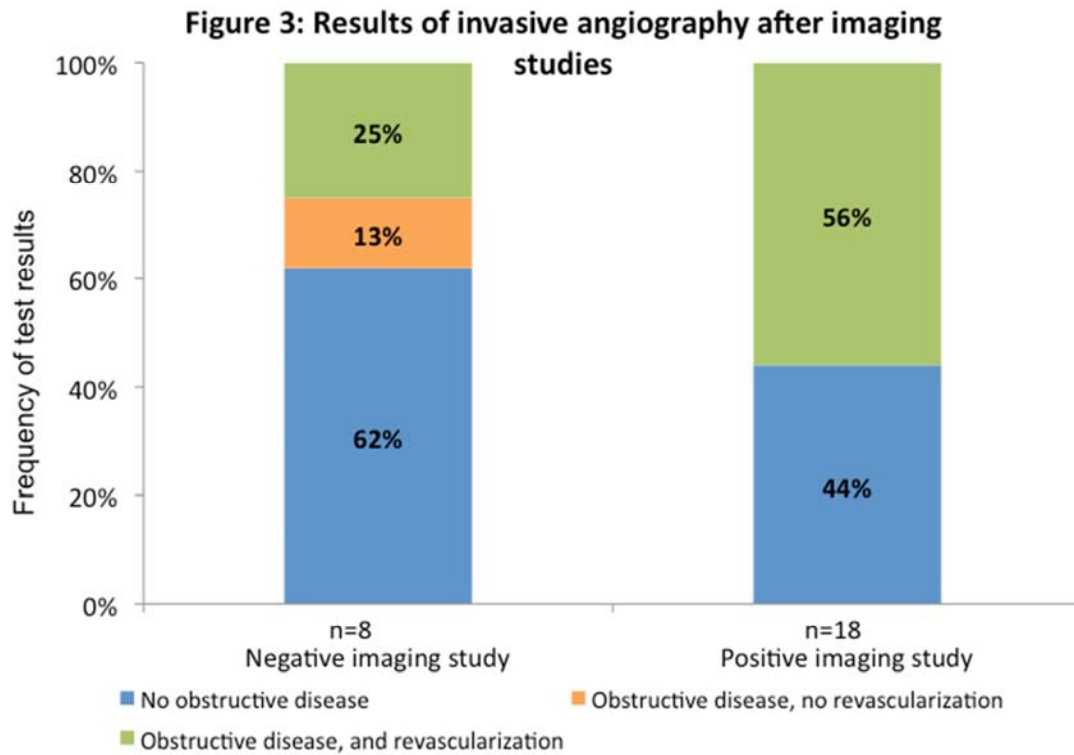

**Appendix 1B**

We repeated our analysis after excluding the patients who had Cardiac CT (N=17), CMR (N=6), and stress echocardiography (N=39) as part of their follow-up testing. The results remain unchanged and the differences in survival stratified by ETT results were unchanged, as shown in the two figures below.

Appendix 1B, Figure 1:

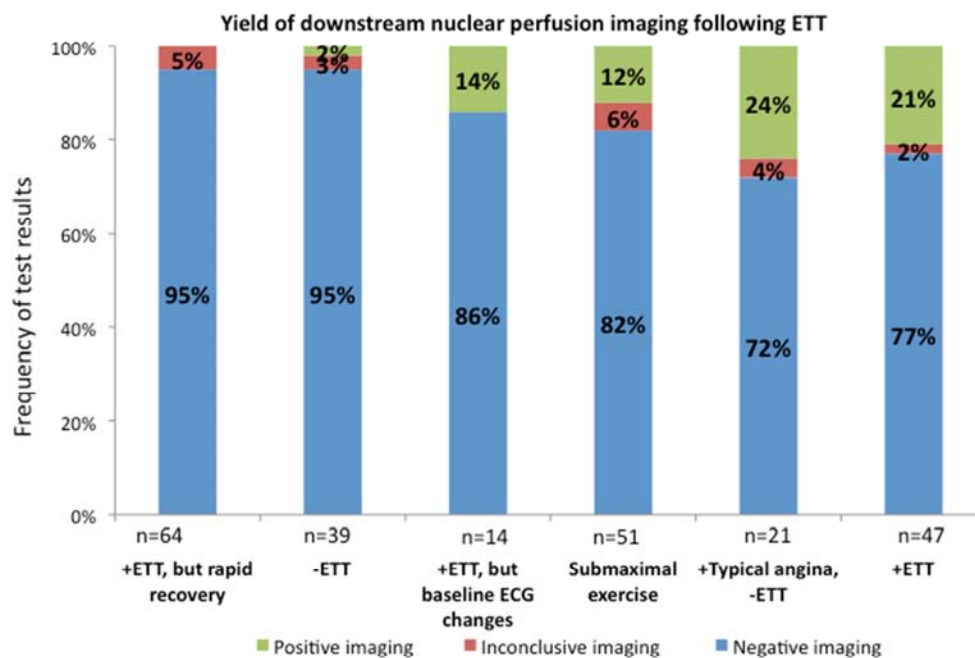

Appendix 1B, Figure 2:

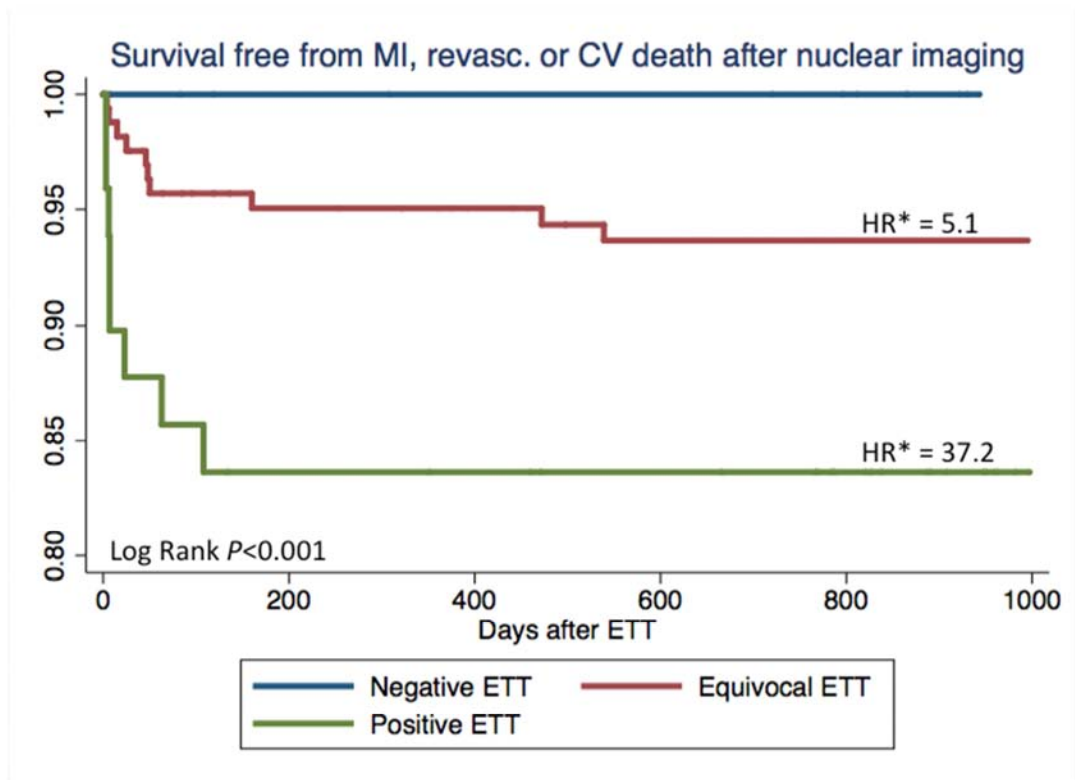

**Appendix 1C**

We compared characteristics of patients with positive versus negative downstream tests after positive ETT, and found that a higher proportion of patients with positive downstream tests after positive ETT were male, older, and had a lower Duke Treadmill Score and typical angina during ETT, as tabulated below.

Appendix 1C, Table 1: Characteristics of patients with positive vs. negative downstream tests after positive ETT

|                                     | Positive Downstream test (n=37) | Negative Downstream test (n=57) | <i>P</i> -value |
|-------------------------------------|---------------------------------|---------------------------------|-----------------|
| Male                                | 25 (68%)                        | 23 (40%)                        | 0.010           |
| Age, years (standard deviation, SD) | 64 (11)                         | 59 (11)                         | 0.033           |
| Hypertension                        | 20 (54%)                        | 32 (56%)                        | 0.842           |
| Diabetes                            | 6 (16%)                         | 7 (12%)                         | 0.589           |
| Hyperlipidemia                      | 15 (40%)                        | 29 (51%)                        | 0.326           |
| Current smoker                      | 6 (16%)                         | 7 (12%)                         | 0.589           |
| Family history of CAD               | 17 (46%)                        | 31 (54%)                        | 0.424           |
| BMI (SD)                            | 28.3 (5.1)                      | 26.7 (6.6)                      | 0.219           |
| Morise score (SD)                   | 12.9 (3.9)                      | 11.7 (4.9)                      | 0.222           |
| Morise pre-test probability of CAD  | 47.3%                           | 42.5%                           | 0.320           |
| METs (SD)                           | 8.8 (2.7)                       | 10.0 (3.1)                      | 0.062           |
| Duke Treadmill Score                | -2.9 (6.3)                      | 0.5 (4.2)                       | 0.003           |

| (SD)                        |          |          |       |
|-----------------------------|----------|----------|-------|
| No symptoms during test     | 11 (30%) | 29 (50%) | 0.043 |
| Typical angina during test  | 15 (40%) | 11 (19%) | 0.024 |
| Atypical angina during test | 2 (5%)   | 1 (2%)   | 0.325 |
| Dyspnea during test         | 9 (24%)  | 14 (24%) | 0.979 |
| Other symptoms during test  | 12 (32%) | 9 (15%)  | 0.058 |
